# Supplementary material for: Application of Artificial Intelligence Methods for Predicting the Compressive Strength of Self-Compacting Concrete with Class F Fly Ash
Source: MDPI journal article supplement (doi:10.3390/ma15124191), 2022-06-13
Supplement: s1 [file s1]

# Application of Artificial Intelligence Methods for Predicting the Compressive Strength of Self-Compacting Concrete with Class F Fly Ash

Miljan Kovačević <sup>1\*</sup>, Silva Lozančić <sup>2\*</sup>, Emmanuel Karlo Nyarko <sup>3</sup> and Marijana Hadzima-Nyarko <sup>2</sup>

<sup>1</sup> Faculty of Technical Sciences, University of Pristina, Knjaza Milosa 7, 38220 Kosovska Mitrovica, Serbia

<sup>2</sup> Faculty of Civil Engineering and Architecture Osijek, Josip Juraj Strossmayer University of Osijek, Vladimira Preloga 3, 31000 Osijek, Croatia; mhadzima@gfos.hr

<sup>3</sup> Faculty of Electrical Engineering, Computer Science and Information Technology, Josip Juraj Strossmayer University of Osijek, Kneza Trpimira 2B, 31000 Osijek, Croatia; karlo.nyarko@ferit.hr

\* Correspondence: miljan.kovacevic@pr.ac.rs (M.K.); lozancic@gfos.hr (S.L.); Tel.: +381-606173801 (M.K.); +385-31-544-665 (S.L.)

## Training dataset

| Sample | C<br>(kg/m <sup>3</sup> ) | W<br>(kg/m <sup>3</sup> ) | Class F<br>FA<br>(kg/m <sup>3</sup> ) | CA<br>(kg/m <sup>3</sup> ) | FA<br>(kg/m <sup>3</sup> ) | SP<br>(%) | Age<br>(days) | f <sub>c</sub><br>(MPa) |
|--------|---------------------------|---------------------------|---------------------------------------|----------------------------|----------------------------|-----------|---------------|-------------------------|
| 1      | 350.00                    | 251.16                    | 133.00                                | 883.00                     | 815.00                     | 0.16      | 28.00         | 55.30                   |
| 2      | 225.00                    | 175.00                    | 275.00                                | 652.00                     | 908.00                     | 1.50      | 7.00          | 40.85                   |
| 3      | 300.00                    | 190.00                    | 200.00                                | 735.00                     | 910.00                     | 1.35      | 7.00          | 27.94                   |
| 4      | 232.00                    | 135.45                    | 155.00                                | 847.00                     | 846.00                     | 0.38      | 28.00         | 48.30                   |
| 5      | 350.00                    | 190.00                    | 150.00                                | 735.00                     | 910.00                     | 1.35      | 7.00          | 33.57                   |
| 6      | 375.00                    | 195.00                    | 125.00                                | 735.00                     | 910.00                     | 1.35      | 7.00          | 30.37                   |
| 7      | 160.00                    | 156.00                    | 240.00                                | 900.00                     | 886.00                     | 0.35      | 28.00         | 44.00                   |
| 8      | 260.00                    | 227.90                    | 170.00                                | 837.00                     | 717.00                     | 0.70      | 7.00          | 16.70                   |
| 9      | 250.00                    | 225.50                    | 160.00                                | 837.00                     | 739.00                     | 0.00      | 90.00         | 42.00                   |
| 10     | 260.00                    | 227.90                    | 170.00                                | 837.00                     | 717.00                     | 0.70      | 90.00         | 38.20                   |
| 11     | 260.00                    | 215.00                    | 260.00                                | 775.00                     | 757.00                     | 0.77      | 28.00         | 30.90                   |
| 12     | 355.00                    | 242.00                    | 195.00                                | 590.00                     | 910.00                     | 1.80      | 90.00         | 40.84                   |
| 13     | 220.00                    | 176.00                    | 330.00                                | 881.00                     | 686.00                     | 1.21      | 90.00         | 64.80                   |
| 14     | 350.00                    | 214.00                    | 170.00                                | 792.00                     | 774.00                     | 0.81      | 365.00        | 74.10                   |
| 15     | 220.00                    | 156.00                    | 180.00                                | 900.00                     | 916.00                     | 0.35      | 1.00          | 13.00                   |
| 16     | 280.00                    | 258.50                    | 190.00                                | 837.00                     | 599.00                     | 0.70      | 90.00         | 36.50                   |
| 17     | 405.00                    | 189.00                    | 45.00                                 | 612.00                     | 1109.00                    | 4.60      | 28.00         | 15.99                   |
| 18     | 198.00                    | 154.80                    | 232.00                                | 900.00                     | 872.00                     | 0.50      | 1.00          | 13.00                   |
| 19     | 250.00                    | 225.50                    | 160.00                                | 837.00                     | 742.00                     | 0.50      | 28.00         | 26.96                   |
| 20     | 375.00                    | 195.00                    | 125.00                                | 735.00                     | 910.00                     | 1.35      | 130.00        | 53.56                   |
| 21     | 183.00                    | 188.65                    | 160.00                                | 837.00                     | 891.00                     | 0.50      | 28.00         | 22.10                   |
| 22     | 170.00                    | 159.10                    | 200.00                                | 900.00                     | 928.00                     | 0.50      | 28.00         | 33.00                   |
| 23     | 400.00                    | 180.00                    | 20.00                                 | 876.00                     | 845.00                     | 0.70      | 7.00          | 44.00                   |
| 24     | 360.00                    | 189.00                    | 90.00                                 | 612.00                     | 1109.00                    | 4.60      | 7.00          | 15.00                   |
| 25     | 250.00                    | 225.50                    | 160.00                                | 837.00                     | 746.00                     | 1.00      | 90.00         | 40.30                   |
| 26     | 300.00                    | 200.00                    | 200.00                                | 860.00                     | 845.00                     | 1.80      | 90.00         | 35.00                   |

| Sample | C<br>(kg/m <sup>3</sup> ) | W<br>(kg/m <sup>3</sup> ) | Class F<br>FA<br>(kg/m <sup>3</sup> ) | CA<br>(kg/m <sup>3</sup> ) | FA<br>(kg/m <sup>3</sup> ) | SP<br>(%) | Age<br>(days) | f <sub>c</sub><br>(MPa) |
|--------|---------------------------|---------------------------|---------------------------------------|----------------------------|----------------------------|-----------|---------------|-------------------------|
| 27     | 220.00                    | 180.00                    | 180.00                                | 900.00                     | 850.00                     | 0.35      | 1.00          | 8.00                    |
| 28     | 450.00                    | 188.00                    | 70.00                                 | 844.00                     | 825.00                     | 2.34      | 90.00         | 78.60                   |
| 29     | 380.00                    | 200.00                    | 192.00                                | 621.00                     | 931.00                     | 0.43      | 7.00          | 45.70                   |
| 30     | 350.00                    | 214.00                    | 170.00                                | 792.00                     | 774.00                     | 0.81      | 28.00         | 50.30                   |
| 31     | 325.00                    | 190.00                    | 175.00                                | 735.00                     | 910.00                     | 1.35      | 3.00          | 22.36                   |
| 32     | 325.00                    | 190.00                    | 175.00                                | 735.00                     | 910.00                     | 1.35      | 130.00        | 58.11                   |
| 33     | 250.00                    | 155.80                    | 160.00                                | 837.00                     | 919.00                     | 0.50      | 7.00          | 23.90                   |
| 34     | 225.00                    | 189.00                    | 225.00                                | 612.00                     | 1109.00                    | 4.60      | 7.00          | 12.09                   |
| 35     | 349.00                    | 291.27                    | 162.00                                | 852.00                     | 779.00                     | 0.14      | 28.00         | 59.90                   |
| 36     | 250.00                    | 155.80                    | 160.00                                | 837.00                     | 919.00                     | 0.50      | 90.00         | 48.30                   |
| 37     | 230.00                    | 192.40                    | 140.00                                | 837.00                     | 864.00                     | 0.80      | 90.00         | 43.50                   |
| 38     | 220.00                    | 156.00                    | 180.00                                | 900.00                     | 916.00                     | 0.35      | 1.00          | 12.00                   |
| 39     | 225.00                    | 180.00                    | 225.00                                | 818.00                     | 818.00                     | 0.35      | 7.00          | 26.20                   |
| 40     | 440.00                    | 176.00                    | 110.00                                | 917.00                     | 714.00                     | 1.35      | 28.00         | 69.80                   |
| 41     | 240.00                    | 202.80                    | 150.00                                | 837.00                     | 831.00                     | 0.60      | 90.00         | 44.20                   |
| 42     | 280.00                    | 258.50                    | 190.00                                | 837.00                     | 599.00                     | 0.70      | 7.00          | 14.70                   |
| 43     | 337.50                    | 189.00                    | 112.50                                | 612.00                     | 1109.00                    | 4.60      | 7.00          | 19.66                   |
| 44     | 325.00                    | 250.25                    | 60.00                                 | 850.00                     | 899.00                     | 0.43      | 28.00         | 31.70                   |
| 45     | 250.00                    | 225.50                    | 160.00                                | 837.00                     | 742.00                     | 0.50      | 90.00         | 41.50                   |
| 46     | 275.00                    | 351.75                    | 250.00                                | 840.00                     | 775.00                     | 0.09      | 28.00         | 54.50                   |
| 47     | 250.00                    | 390.39                    | 257.00                                | 853.00                     | 787.00                     | 0.11      | 28.00         | 51.50                   |
| 48     | 290.00                    | 229.50                    | 220.00                                | 837.00                     | 625.00                     | 0.20      | 90.00         | 44.90                   |
| 49     | 237.00                    | 133.20                    | 133.00                                | 900.00                     | 1034.00                    | 0.20      | 28.00         | 49.00                   |
| 50     | 198.00                    | 153.00                    | 232.00                                | 900.00                     | 874.00                     | 0.20      | 1.00          | 9.00                    |
| 51     | 207.00                    | 186.30                    | 207.00                                | 843.00                     | 845.00                     | 0.40      | 1.00          | 6.10                    |
| 52     | 415.00                    | 231.00                    | 135.00                                | 590.00                     | 910.00                     | 1.80      | 365.00        | 46.57                   |
| 53     | 317.00                    | 262.35                    | 160.00                                | 837.00                     | 594.00                     | 0.50      | 90.00         | 29.10                   |
| 54     | 237.00                    | 159.10                    | 133.00                                | 900.00                     | 960.00                     | 0.50      | 28.00         | 46.00                   |
| 55     | 375.00                    | 175.00                    | 125.00                                | 679.00                     | 938.00                     | 1.50      | 3.00          | 57.26                   |
| 56     | 180.00                    | 166.50                    | 270.00                                | 850.00                     | 850.00                     | 0.21      | 1.00          | 5.00                    |
| 57     | 380.00                    | 200.00                    | 192.00                                | 621.00                     | 931.00                     | 0.43      | 1.00          | 23.20                   |
| 58     | 333.00                    | 173.00                    | 162.00                                | 924.00                     | 743.00                     | 0.75      | 90.00         | 63.00                   |
| 59     | 250.00                    | 281.05                    | 261.00                                | 837.00                     | 478.00                     | 0.50      | 90.00         | 29.50                   |
| 60     | 400.00                    | 180.00                    | 20.00                                 | 876.00                     | 845.00                     | 0.70      | 56.00         | 63.11                   |
| 61     | 247.00                    | 185.40                    | 165.00                                | 846.00                     | 845.00                     | 0.12      | 28.00         | 34.60                   |
| 62     | 350.00                    | 190.00                    | 150.00                                | 876.00                     | 830.00                     | 1.82      | 28.00         | 30.50                   |
| 63     | 437.00                    | 176.00                    | 80.00                                 | 924.00                     | 743.00                     | 0.90      | 180.00        | 83.20                   |
| 64     | 100.00                    | 180.00                    | 80.00                                 | 876.00                     | 751.00                     | 0.70      | 56.00         | 12.00                   |
| 65     | 247.00                    | 185.40                    | 165.00                                | 846.00                     | 845.00                     | 0.12      | 7.00          | 21.20                   |
| 66     | 260.00                    | 227.90                    | 170.00                                | 837.00                     | 717.00                     | 0.70      | 28.00         | 27.80                   |
| 67     | 250.00                    | 281.05                    | 261.00                                | 837.00                     | 478.00                     | 0.50      | 7.00          | 9.60                    |
| 68     | 300.00                    | 190.00                    | 200.00                                | 735.00                     | 910.00                     | 1.35      | 28.00         | 45.26                   |
| 69     | 180.00                    | 166.50                    | 270.00                                | 850.00                     | 850.00                     | 0.21      | 7.00          | 14.70                   |
| 70     | 218.00                    | 178.00                    | 373.00                                | 700.00                     | 743.00                     | 0.51      | 182.00        | 49.60                   |
| 71     | 250.00                    | 225.50                    | 160.00                                | 837.00                     | 746.00                     | 1.00      | 28.00         | 26.70                   |
| 72     | 382.50                    | 189.00                    | 67.50                                 | 612.00                     | 1109.00                    | 4.60      | 7.00          | 13.10                   |

| Sample | C<br>(kg/m <sup>3</sup> ) | W<br>(kg/m <sup>3</sup> ) | Class F<br>FA<br>(kg/m <sup>3</sup> ) | CA<br>(kg/m <sup>3</sup> ) | FA<br>(kg/m <sup>3</sup> ) | SP<br>(%) | Age<br>(days) | f <sub>c</sub><br>(MPa) |
|--------|---------------------------|---------------------------|---------------------------------------|----------------------------|----------------------------|-----------|---------------|-------------------------|
| 73     | 300.00                    | 175.00                    | 200.00                                | 663.00                     | 923.00                     | 1.50      | 3.00          | 48.51                   |
| 74     | 248.00                    | 175.90                    | 203.00                                | 900.00                     | 808.00                     | 0.35      | 28.00         | 50.00                   |
| 75     | 405.00                    | 189.00                    | 45.00                                 | 612.00                     | 1109.00                    | 4.60      | 7.00          | 12.77                   |
| 76     | 197.00                    | 137.90                    | 197.00                                | 856.00                     | 856.00                     | 0.28      | 7.00          | 22.90                   |
| 77     | 218.00                    | 178.00                    | 373.00                                | 700.00                     | 743.00                     | 0.51      | 90.00         | 48.90                   |
| 78     | 322.00                    | 161.00                    | 138.00                                | 1058.20                    | 693.81                     | 0.24      | 3.00          | 32.77                   |
| 79     | 198.00                    | 146.20                    | 232.00                                | 900.00                     | 874.00                     | 0.20      | 28.00         | 46.00                   |
| 80     | 386.00                    | 193.00                    | 72.00                                 | 1190.00                    | 523.00                     | 0.42      | 56.00         | 48.80                   |
| 81     | 355.00                    | 164.00                    | 143.00                                | 1064.00                    | 581.00                     | 0.63      | 90.00         | 44.52                   |
| 82     | 200.00                    | 160.00                    | 200.00                                | 843.00                     | 842.00                     | 0.17      | 28.00         | 34.90                   |
| 83     | 180.00                    | 166.50                    | 270.00                                | 850.00                     | 850.00                     | 0.21      | 28.00         | 23.65                   |
| 84     | 198.00                    | 154.80                    | 232.00                                | 900.00                     | 872.00                     | 0.50      | 28.00         | 52.00                   |
| 85     | 183.00                    | 188.65                    | 160.00                                | 837.00                     | 891.00                     | 0.50      | 90.00         | 34.20                   |
| 86     | 197.00                    | 137.90                    | 197.00                                | 856.00                     | 856.00                     | 0.28      | 28.00         | 38.90                   |
| 87     | 238.00                    | 158.80                    | 159.00                                | 844.00                     | 844.00                     | 0.29      | 1.00          | 10.70                   |
| 88     | 300.00                    | 200.00                    | 200.00                                | 860.00                     | 845.00                     | 1.80      | 28.00         | 26.10                   |
| 89     | 440.00                    | 225.50                    | 110.00                                | 590.00                     | 910.00                     | 2.00      | 365.00        | 54.60                   |
| 90     | 503.00                    | 183.00                    | 158.00                                | 700.00                     | 735.00                     | 0.76      | 7.00          | 58.80                   |
| 91     | 276.00                    | 161.00                    | 184.00                                | 1058.20                    | 693.81                     | 0.24      | 3.00          | 26.50                   |
| 92     | 300.00                    | 175.00                    | 200.00                                | 663.00                     | 923.00                     | 1.50      | 28.00         | 54.61                   |
| 93     | 230.00                    | 192.40                    | 140.00                                | 837.00                     | 864.00                     | 0.80      | 7.00          | 19.30                   |
| 94     | 290.00                    | 180.00                    | 318.00                                | 700.00                     | 741.00                     | 0.66      | 7.00          | 34.40                   |
| 95     | 290.00                    | 175.50                    | 100.00                                | 837.00                     | 913.00                     | 0.80      | 28.00         | 42.70                   |
| 96     | 115.00                    | 167.00                    | 336.00                                | 924.00                     | 743.00                     | 0.65      | 180.00        | 37.20                   |
| 97     | 333.00                    | 173.00                    | 162.00                                | 924.00                     | 743.00                     | 0.75      | 28.00         | 58.50                   |
| 98     | 350.00                    | 214.00                    | 170.00                                | 792.00                     | 774.00                     | 0.81      | 90.00         | 61.10                   |
| 99     | 250.00                    | 295.20                    | 160.00                                | 837.00                     | 566.00                     | 0.50      | 28.00         | 11.00                   |
| 100    | 386.00                    | 193.00                    | 161.00                                | 1190.00                    | 434.00                     | 0.35      | 28.00         | 44.70                   |
| 101    | 163.00                    | 163.20                    | 245.00                                | 851.00                     | 851.00                     | 0.20      | 28.00         | 26.20                   |
| 102    | 170.00                    | 159.10                    | 200.00                                | 900.00                     | 928.00                     | 0.50      | 1.00          | 5.00                    |
| 103    | 386.00                    | 193.00                    | 72.00                                 | 1190.00                    | 523.00                     | 0.42      | 7.00          | 29.20                   |
| 104    | 115.00                    | 167.00                    | 336.00                                | 924.00                     | 743.00                     | 0.65      | 28.00         | 16.00                   |
| 105    | 220.00                    | 156.00                    | 180.00                                | 900.00                     | 916.00                     | 0.35      | 1.00          | 12.50                   |
| 106    | 225.00                    | 180.00                    | 225.00                                | 818.00                     | 818.00                     | 0.35      | 90.00         | 45.93                   |
| 107    | 248.00                    | 176.00                    | 203.00                                | 900.00                     | 808.00                     | 0.35      | 1.00          | 12.00                   |
| 108    | 250.00                    | 225.50                    | 160.00                                | 837.00                     | 742.00                     | 0.50      | 90.00         | 39.20                   |
| 109    | 210.00                    | 193.50                    | 220.00                                | 837.00                     | 768.00                     | 0.80      | 90.00         | 45.60                   |
| 110    | 325.00                    | 195.00                    | 109.00                                | 896.00                     | 747.00                     | 0.75      | 90.00         | 32.41                   |
| 111    | 465.00                    | 225.50                    | 85.00                                 | 590.00                     | 910.00                     | 1.95      | 90.00         | 59.04                   |
| 112    | 135.00                    | 180.00                    | 315.00                                | 805.00                     | 805.00                     | 0.26      | 28.00         | 36.09                   |
| 113    | 322.00                    | 161.00                    | 138.00                                | 1058.20                    | 693.81                     | 0.24      | 28.00         | 57.34                   |
| 114    | 220.00                    | 176.00                    | 330.00                                | 881.00                     | 686.00                     | 1.21      | 28.00         | 47.50                   |
| 115    | 290.00                    | 180.00                    | 318.00                                | 700.00                     | 741.00                     | 0.66      | 182.00        | 59.90                   |
| 116    | 440.00                    | 231.00                    | 110.00                                | 612.00                     | 909.00                     | 3.81      | 7.00          | 17.57                   |
| 117    | 330.00                    | 176.00                    | 220.00                                | 899.00                     | 700.00                     | 1.35      | 28.00         | 60.90                   |
| 118    | 360.00                    | 189.00                    | 90.00                                 | 612.00                     | 1109.00                    | 4.60      | 28.00         | 21.66                   |

| Sample | C<br>(kg/m <sup>3</sup> ) | W<br>(kg/m <sup>3</sup> ) | Class F<br>FA<br>(kg/m <sup>3</sup> ) | CA<br>(kg/m <sup>3</sup> ) | FA<br>(kg/m <sup>3</sup> ) | SP<br>(%) | Age<br>(days) | f <sub>c</sub><br>(MPa) |
|--------|---------------------------|---------------------------|---------------------------------------|----------------------------|----------------------------|-----------|---------------|-------------------------|
| 119    | 412.50                    | 231.00                    | 137.50                                | 612.00                     | 909.00                     | 3.81      | 7.00          | 18.68                   |
| 120    | 386.00                    | 193.00                    | 161.00                                | 1190.00                    | 434.00                     | 0.35      | 119.00        | 54.50                   |
| 121    | 412.50                    | 231.00                    | 137.50                                | 612.00                     | 909.00                     | 3.81      | 28.00         | 25.12                   |
| 122    | 300.00                    | 180.00                    | 40.00                                 | 876.00                     | 813.00                     | 0.70      | 7.00          | 43.50                   |
| 123    | 250.00                    | 225.50                    | 160.00                                | 837.00                     | 746.00                     | 1.00      | 7.00          | 15.80                   |
| 124    | 232.00                    | 135.45                    | 155.00                                | 847.00                     | 846.00                     | 0.38      | 1.00          | 16.60                   |
| 125    | 270.00                    | 247.50                    | 180.00                                | 837.00                     | 647.00                     | 0.60      | 28.00         | 24.50                   |
| 126    | 415.00                    | 231.00                    | 135.00                                | 590.00                     | 910.00                     | 1.80      | 28.00         | 31.50                   |
| 127    | 467.50                    | 231.00                    | 82.50                                 | 612.00                     | 909.00                     | 3.81      | 28.00         | 18.30                   |
| 128    | 250.00                    | 281.05                    | 261.00                                | 837.00                     | 478.00                     | 0.50      | 28.00         | 17.00                   |
| 129    | 270.00                    | 198.00                    | 180.00                                | 842.00                     | 801.00                     | 0.66      | 28.00         | 44.70                   |
| 130    | 225.00                    | 170.00                    | 247.00                                | 924.00                     | 743.00                     | 0.68      | 90.00         | 49.30                   |
| 131    | 232.00                    | 135.45                    | 155.00                                | 847.00                     | 846.00                     | 0.38      | 7.00          | 31.30                   |
| 132    | 325.00                    | 190.00                    | 175.00                                | 735.00                     | 910.00                     | 1.35      | 28.00         | 42.56                   |
| 133    | 350.00                    | 302.08                    | 162.00                                | 840.00                     | 768.00                     | 0.09      | 28.00         | 51.70                   |
| 134    | 495.00                    | 231.00                    | 55.00                                 | 612.00                     | 909.00                     | 3.81      | 28.00         | 17.20                   |
| 135    | 380.00                    | 184.00                    | 145.00                                | 854.00                     | 788.00                     | 0.42      | 7.00          | 53.20                   |
| 136    | 200.00                    | 160.00                    | 200.00                                | 843.00                     | 842.00                     | 0.17      | 7.00          | 19.30                   |
| 137    | 333.00                    | 173.00                    | 162.00                                | 924.00                     | 743.00                     | 0.75      | 180.00        | 68.00                   |
| 138    | 276.00                    | 161.00                    | 184.00                                | 1058.20                    | 693.81                     | 0.24      | 90.00         | 71.66                   |
| 139    | 260.00                    | 215.00                    | 260.00                                | 775.00                     | 757.00                     | 0.77      | 90.00         | 39.30                   |
| 140    | 350.00                    | 190.00                    | 150.00                                | 735.00                     | 910.00                     | 1.35      | 28.00         | 45.11                   |
| 141    | 170.00                    | 159.10                    | 200.00                                | 900.00                     | 930.00                     | 0.20      | 28.00         | 31.00                   |
| 142    | 180.00                    | 198.00                    | 270.00                                | 829.00                     | 778.00                     | 0.67      | 28.00         | 30.30                   |
| 143    | 300.00                    | 180.00                    | 40.00                                 | 876.00                     | 813.00                     | 0.70      | 56.00         | 70.88                   |
| 144    | 250.00                    | 225.50                    | 160.00                                | 837.00                     | 742.00                     | 0.50      | 7.00          | 13.90                   |
| 145    | 450.00                    | 188.00                    | 70.00                                 | 844.00                     | 825.00                     | 2.34      | 365.00        | 90.60                   |
| 146    | 290.00                    | 253.50                    | 100.00                                | 837.00                     | 709.00                     | 0.20      | 28.00         | 26.60                   |
| 147    | 360.00                    | 198.00                    | 90.00                                 | 855.00                     | 813.00                     | 0.71      | 90.00         | 68.00                   |
| 148    | 230.00                    | 192.40                    | 140.00                                | 837.00                     | 864.00                     | 0.80      | 28.00         | 32.10                   |
| 149    | 218.00                    | 178.00                    | 373.00                                | 700.00                     | 743.00                     | 0.51      | 28.00         | 35.30                   |
| 150    | 317.00                    | 262.35                    | 160.00                                | 837.00                     | 594.00                     | 0.50      | 28.00         | 29.10                   |
| 151    | 163.00                    | 163.20                    | 245.00                                | 851.00                     | 851.00                     | 0.20      | 7.00          | 14.70                   |
| 152    | 330.00                    | 231.00                    | 220.00                                | 612.00                     | 909.00                     | 3.81      | 7.00          | 16.96                   |
| 153    | 330.00                    | 176.00                    | 220.00                                | 899.00                     | 700.00                     | 1.35      | 28.00         | 60.90                   |
| 154    | 200.00                    | 180.00                    | 60.00                                 | 876.00                     | 782.00                     | 0.70      | 56.00         | 40.44                   |
| 155    | 160.00                    | 156.00                    | 240.00                                | 900.00                     | 886.00                     | 0.35      | 1.00          | 7.00                    |
| 156    | 322.00                    | 161.00                    | 138.00                                | 1058.20                    | 693.81                     | 0.24      | 7.00          | 45.76                   |
| 157    | 350.00                    | 178.00                    | 186.00                                | 851.00                     | 786.00                     | 0.45      | 1.00          | 18.30                   |
| 158    | 386.00                    | 193.00                    | 161.00                                | 1190.00                    | 434.00                     | 0.35      | 7.00          | 26.10                   |
| 159    | 437.00                    | 176.00                    | 80.00                                 | 924.00                     | 743.00                     | 0.90      | 90.00         | 78.00                   |
| 160    | 415.00                    | 231.00                    | 135.00                                | 590.00                     | 910.00                     | 1.80      | 90.00         | 43.87                   |
| 161    | 238.00                    | 158.80                    | 159.00                                | 844.00                     | 844.00                     | 0.29      | 7.00          | 25.80                   |
| 162    | 220.00                    | 156.00                    | 180.00                                | 900.00                     | 916.00                     | 0.60      | 28.00         | 43.00                   |
| 163    | 350.00                    | 235.11                    | 111.00                                | 900.00                     | 831.00                     | 0.15      | 28.00         | 61.00                   |
| 164    | 330.00                    | 231.00                    | 220.00                                | 612.00                     | 909.00                     | 3.81      | 28.00         | 19.93                   |

| Sample | C<br>(kg/m <sup>3</sup> ) | W<br>(kg/m <sup>3</sup> ) | Class F<br>FA<br>(kg/m <sup>3</sup> ) | CA<br>(kg/m <sup>3</sup> ) | FA<br>(kg/m <sup>3</sup> ) | SP<br>(%) | Age<br>(days) | f <sub>c</sub><br>(MPa) |
|--------|---------------------------|---------------------------|---------------------------------------|----------------------------|----------------------------|-----------|---------------|-------------------------|
| 165    | 503.00                    | 183.00                    | 158.00                                | 700.00                     | 735.00                     | 0.76      | 90.00         | 71.70                   |
| 166    | 218.00                    | 178.00                    | 373.00                                | 700.00                     | 743.00                     | 0.51      | 7.00          | 21.60                   |
| 167    | 355.00                    | 242.00                    | 195.00                                | 590.00                     | 910.00                     | 1.80      | 365.00        | 43.70                   |
| 168    | 225.00                    | 189.00                    | 225.00                                | 612.00                     | 1109.00                    | 4.60      | 28.00         | 19.21                   |
| 169    | 280.00                    | 156.00                    | 120.00                                | 900.00                     | 946.00                     | 0.35      | 1.00          | 16.00                   |
| 170    | 350.00                    | 178.00                    | 186.00                                | 851.00                     | 786.00                     | 0.45      | 7.00          | 51.10                   |
| 171    | 210.00                    | 193.50                    | 220.00                                | 837.00                     | 768.00                     | 0.80      | 28.00         | 26.70                   |
| 172    | 300.00                    | 180.00                    | 40.00                                 | 876.00                     | 813.00                     | 0.70      | 1.00          | 16.66                   |
| 173    | 350.00                    | 211.20                    | 90.00                                 | 923.00                     | 852.00                     | 0.14      | 28.00         | 46.50                   |
| 174    | 348.00                    | 286.00                    | 224.00                                | 848.00                     | 783.00                     | 0.43      | 28.00         | 58.60                   |
| 175    | 375.00                    | 195.00                    | 125.00                                | 735.00                     | 910.00                     | 1.35      | 28.00         | 49.39                   |
| 176    | 315.00                    | 180.00                    | 135.00                                | 831.00                     | 831.00                     | 0.40      | 90.00         | 50.13                   |
| 177    | 197.00                    | 137.90                    | 197.00                                | 856.00                     | 856.00                     | 0.28      | 1.00          | 7.80                    |
| 178    | 380.00                    | 252.00                    | 145.00                                | 659.00                     | 988.00                     | 0.13      | 28.00         | 65.50                   |
| 179    | 325.00                    | 333.75                    | 120.00                                | 850.00                     | 755.00                     | 0.43      | 28.00         | 32.20                   |
| 180    | 220.00                    | 156.00                    | 180.00                                | 900.00                     | 916.00                     | 0.60      | 1.00          | 12.00                   |
| 181    | 247.00                    | 185.40                    | 165.00                                | 846.00                     | 845.00                     | 0.12      | 1.00          | 8.70                    |
| 182    | 290.00                    | 229.50                    | 220.00                                | 837.00                     | 625.00                     | 0.20      | 7.00          | 11.50                   |
| 183    | 250.00                    | 225.50                    | 160.00                                | 837.00                     | 739.00                     | 0.00      | 28.00         | 27.30                   |
| 184    | 467.50                    | 231.00                    | 82.50                                 | 612.00                     | 909.00                     | 3.81      | 7.00          | 16.71                   |
| 185    | 350.00                    | 273.36                    | 186.00                                | 851.00                     | 786.00                     | 0.11      | 28.00         | 70.40                   |
| 186    | 375.00                    | 175.00                    | 125.00                                | 679.00                     | 938.00                     | 1.50      | 7.00          | 59.90                   |
| 187    | 330.00                    | 176.00                    | 220.00                                | 899.00                     | 700.00                     | 1.35      | 90.00         | 77.90                   |
| 188    | 375.00                    | 175.00                    | 125.00                                | 679.00                     | 938.00                     | 1.50      | 28.00         | 61.33                   |
| 189    | 380.00                    | 200.00                    | 192.00                                | 621.00                     | 931.00                     | 0.43      | 28.00         | 67.80                   |
| 190    | 183.00                    | 188.65                    | 160.00                                | 837.00                     | 891.00                     | 0.50      | 7.00          | 12.00                   |
| 191    | 100.00                    | 180.00                    | 80.00                                 | 876.00                     | 751.00                     | 0.70      | 7.00          | 5.77                    |
| 192    | 180.00                    | 198.00                    | 270.00                                | 829.00                     | 778.00                     | 0.67      | 90.00         | 42.50                   |
| 193    | 380.00                    | 297.86                    | 192.00                                | 621.00                     | 931.00                     | 0.10      | 28.00         | 67.80                   |
| 194    | 225.00                    | 175.00                    | 275.00                                | 652.00                     | 908.00                     | 1.50      | 3.00          | 40.23                   |
| 195    | 270.00                    | 247.50                    | 180.00                                | 837.00                     | 647.00                     | 0.60      | 90.00         | 37.20                   |
| 196    | 180.00                    | 166.50                    | 270.00                                | 850.00                     | 850.00                     | 0.21      | 90.00         | 32.32                   |
| 197    | 250.00                    | 210.00                    | 250.00                                | 856.00                     | 856.00                     | 1.72      | 28.00         | 21.50                   |
| 198    | 380.00                    | 184.00                    | 145.00                                | 854.00                     | 788.00                     | 0.42      | 1.00          | 26.90                   |
| 199    | 270.00                    | 189.00                    | 180.00                                | 612.00                     | 1109.00                    | 4.60      | 7.00          | 17.56                   |
| 200    | 240.00                    | 202.80                    | 150.00                                | 837.00                     | 831.00                     | 0.60      | 7.00          | 19.00                   |
| 201    | 250.00                    | 295.20                    | 160.00                                | 837.00                     | 566.00                     | 0.50      | 90.00         | 17.20                   |
| 202    | 250.00                    | 225.50                    | 160.00                                | 837.00                     | 739.00                     | 0.00      | 7.00          | 15.50                   |
| 203    | 225.00                    | 175.00                    | 275.00                                | 652.00                     | 908.00                     | 1.50      | 28.00         | 41.95                   |
| 204    | 250.00                    | 295.20                    | 160.00                                | 837.00                     | 566.00                     | 0.50      | 7.00          | 6.20                    |
| 205    | 386.00                    | 193.00                    | 72.00                                 | 1190.00                    | 523.00                     | 0.42      | 28.00         | 35.30                   |
| 206    | 225.00                    | 170.00                    | 247.00                                | 924.00                     | 743.00                     | 0.68      | 28.00         | 37.20                   |
| 207    | 368.00                    | 161.00                    | 92.00                                 | 1058.20                    | 693.81                     | 0.24      | 7.00          | 52.49                   |
| 208    | 220.00                    | 156.00                    | 180.00                                | 900.00                     | 916.00                     | 0.35      | 28.00         | 46.00                   |
| 209    | 225.00                    | 170.00                    | 247.00                                | 924.00                     | 743.00                     | 0.68      | 180.00        | 56.40                   |
| 210    | 300.00                    | 190.00                    | 200.00                                | 735.00                     | 910.00                     | 1.35      | 3.00          | 20.09                   |

| Sample | C<br>(kg/m <sup>3</sup> ) | W<br>(kg/m <sup>3</sup> ) | Class F<br>FA<br>(kg/m <sup>3</sup> ) | CA<br>(kg/m <sup>3</sup> ) | FA<br>(kg/m <sup>3</sup> ) | SP<br>(%) | Age<br>(days) | f <sub>c</sub><br>(MPa) |
|--------|---------------------------|---------------------------|---------------------------------------|----------------------------|----------------------------|-----------|---------------|-------------------------|
| 211    | 292.50                    | 189.00                    | 157.50                                | 612.00                     | 1109.00                    | 4.60      | 7.00          | 18.44                   |
| 212    | 250.00                    | 155.80                    | 160.00                                | 837.00                     | 919.00                     | 0.50      | 28.00         | 36.30                   |
| 213    | 290.00                    | 229.50                    | 220.00                                | 837.00                     | 625.00                     | 0.20      | 28.00         | 32.90                   |
| 214    | 163.00                    | 163.20                    | 245.00                                | 851.00                     | 851.00                     | 0.20      | 1.00          | 4.90                    |
| 215    | 440.00                    | 176.00                    | 110.00                                | 917.00                     | 714.00                     | 1.35      | 28.00         | 69.80                   |
| 216    | 238.00                    | 158.80                    | 159.00                                | 844.00                     | 844.00                     | 0.29      | 28.00         | 37.80                   |
| 217    | 250.00                    | 225.50                    | 160.00                                | 837.00                     | 742.00                     | 0.50      | 90.00         | 40.96                   |
| 218    | 100.00                    | 180.00                    | 80.00                                 | 876.00                     | 751.00                     | 0.70      | 28.00         | 10.66                   |
| 219    | 290.00                    | 253.50                    | 100.00                                | 837.00                     | 709.00                     | 0.20      | 7.00          | 12.80                   |
| 220    | 400.00                    | 180.00                    | 20.00                                 | 876.00                     | 845.00                     | 0.70      | 1.00          | 18.88                   |
| 221    | 250.00                    | 225.50                    | 160.00                                | 837.00                     | 742.00                     | 0.50      | 7.00          | 14.70                   |
| 222    | 327.00                    | 265.00                    | 173.00                                | 803.00                     | 902.00                     | 0.20      | 28.00         | 61.60                   |
| 223    | 225.00                    | 180.00                    | 225.00                                | 818.00                     | 818.00                     | 0.35      | 28.00         | 42.67                   |
| 224    | 386.00                    | 193.00                    | 72.00                                 | 1190.00                    | 523.00                     | 0.42      | 119.00        | 51.70                   |
| 225    | 240.00                    | 202.80                    | 150.00                                | 837.00                     | 831.00                     | 0.60      | 28.00         | 30.90                   |
| 226    | 290.00                    | 175.50                    | 100.00                                | 837.00                     | 913.00                     | 0.80      | 7.00          | 32.30                   |
| 227    | 386.00                    | 193.00                    | 72.00                                 | 1190.00                    | 523.00                     | 0.42      | 3.00          | 23.30                   |
| 228    | 207.00                    | 186.30                    | 207.00                                | 843.00                     | 845.00                     | 0.40      | 28.00         | 33.20                   |
| 229    | 368.00                    | 161.00                    | 92.00                                 | 1058.20                    | 693.81                     | 0.24      | 90.00         | 74.61                   |
| 230    | 465.00                    | 225.50                    | 85.00                                 | 590.00                     | 910.00                     | 1.95      | 365.00        | 61.40                   |
| 231    | 250.00                    | 225.50                    | 160.00                                | 837.00                     | 742.00                     | 0.50      | 28.00         | 25.30                   |
| 232    | 250.00                    | 225.50                    | 160.00                                | 837.00                     | 742.00                     | 0.50      | 28.00         | 24.10                   |
| 233    | 315.00                    | 180.00                    | 135.00                                | 831.00                     | 831.00                     | 0.40      | 28.00         | 38.28                   |
| 234    | 276.00                    | 161.00                    | 184.00                                | 1058.20                    | 693.81                     | 0.24      | 28.00         | 54.99                   |
| 235    | 440.00                    | 225.50                    | 110.00                                | 590.00                     | 910.00                     | 2.00      | 28.00         | 33.31                   |
| 236    | 385.00                    | 236.50                    | 165.00                                | 590.00                     | 910.00                     | 1.80      | 90.00         | 42.07                   |
| 237    | 270.00                    | 198.00                    | 180.00                                | 842.00                     | 801.00                     | 0.66      | 90.00         | 60.30                   |
| 238    | 380.00                    | 252.00                    | 145.00                                | 854.00                     | 788.00                     | 0.10      | 28.00         | 73.50                   |
| 239    | 275.00                    | 231.00                    | 275.00                                | 612.00                     | 909.00                     | 3.81      | 7.00          | 12.32                   |
| 240    | 368.00                    | 161.00                    | 92.00                                 | 1058.20                    | 693.81                     | 0.24      | 3.00          | 39.65                   |
| 241    | 380.00                    | 184.00                    | 145.00                                | 854.00                     | 788.00                     | 0.42      | 28.00         | 73.50                   |
| 242    | 280.00                    | 258.50                    | 190.00                                | 837.00                     | 599.00                     | 0.70      | 28.00         | 24.00                   |
| 243    | 210.00                    | 201.50                    | 100.00                                | 837.00                     | 910.00                     | 0.80      | 90.00         | 28.00                   |
| 244    | 495.00                    | 231.00                    | 55.00                                 | 612.00                     | 909.00                     | 3.81      | 7.00          | 16.51                   |
| 245    | 315.00                    | 189.00                    | 135.00                                | 612.00                     | 1109.00                    | 4.60      | 7.00          | 25.33                   |
| 246    | 135.00                    | 180.00                    | 315.00                                | 805.00                     | 805.00                     | 0.26      | 90.00         | 39.88                   |
| 247    | 440.00                    | 176.00                    | 110.00                                | 917.00                     | 714.00                     | 1.35      | 90.00         | 84.40                   |
| 248    | 280.00                    | 156.00                    | 120.00                                | 900.00                     | 946.00                     | 0.35      | 28.00         | 45.00                   |
| 249    | 200.00                    | 180.00                    | 60.00                                 | 876.00                     | 782.00                     | 0.70      | 28.00         | 33.33                   |
| 250    | 350.00                    | 190.00                    | 150.00                                | 876.00                     | 830.00                     | 1.82      | 90.00         | 39.55                   |
| 251    | 220.00                    | 180.00                    | 180.00                                | 900.00                     | 850.00                     | 0.35      | 28.00         | 38.00                   |
| 252    | 61.00                     | 140.70                    | 241.00                                | 864.00                     | 866.00                     | 0.30      | 1.00          | 7.30                    |
| 253    | 437.00                    | 176.00                    | 80.00                                 | 924.00                     | 743.00                     | 0.90      | 28.00         | 69.70                   |
| 254    | 390.00                    | 195.00                    | 156.00                                | 844.00                     | 779.00                     | 0.71      | 28.00         | 53.00                   |
| 255    | 450.00                    | 188.00                    | 70.00                                 | 844.00                     | 825.00                     | 2.34      | 28.00         | 70.80                   |
| 256    | 250.00                    | 225.50                    | 160.00                                | 837.00                     | 742.00                     | 0.50      | 7.00          | 16.56                   |

| Sample | C<br>(kg/m <sup>3</sup> ) | W<br>(kg/m <sup>3</sup> ) | Class F<br>FA<br>(kg/m <sup>3</sup> ) | CA<br>(kg/m <sup>3</sup> ) | FA<br>(kg/m <sup>3</sup> ) | SP<br>(%) | Age<br>(days) | f <sub>c</sub><br>(MPa) |
|--------|---------------------------|---------------------------|---------------------------------------|----------------------------|----------------------------|-----------|---------------|-------------------------|
| 257    | 386.00                    | 193.00                    | 72.00                                 | 1190.00                    | 523.00                     | 0.42      | 7.00          | 24.50                   |
| 258    | 325.00                    | 190.00                    | 175.00                                | 735.00                     | 910.00                     | 1.35      | 7.00          | 29.79                   |
| 259    | 210.00                    | 279.50                    | 220.00                                | 837.00                     | 562.00                     | 0.20      | 7.00          | 6.20                    |
| 260    | 355.00                    | 242.00                    | 195.00                                | 590.00                     | 910.00                     | 1.80      | 28.00         | 29.71                   |
| 261    | 385.00                    | 231.00                    | 165.00                                | 612.00                     | 909.00                     | 3.81      | 7.00          | 26.71                   |
| 262    | 237.00                    | 159.10                    | 133.00                                | 900.00                     | 960.00                     | 0.50      | 1.00          | 16.00                   |

Test dataset

| Sample | C<br>(kg/m <sup>3</sup> ) | W<br>(kg/m <sup>3</sup> ) | Class F<br>FA<br>(kg/m <sup>3</sup> ) | CA<br>(kg/m <sup>3</sup> ) | FA<br>(kg/m <sup>3</sup> ) | SP<br>(%) | Age<br>(days) | f <sub>c</sub><br>(MPa) |
|--------|---------------------------|---------------------------|---------------------------------------|----------------------------|----------------------------|-----------|---------------|-------------------------|
| 263    | 285.50                    | 188.10                    | 285.00                                | 788.70                     | 788.70                     | 0.40      | 28.00         | 58.75                   |
| 264    | 386.00                    | 193.00                    | 72.00                                 | 1190.00                    | 523.00                     | 0.42      | 28.00         | 42.30                   |
| 265    | 385.00                    | 236.50                    | 165.00                                | 590.00                     | 910.00                     | 1.80      | 365.00        | 44.90                   |
| 266    | 503.00                    | 183.00                    | 158.00                                | 700.00                     | 735.00                     | 0.76      | 28.00         | 68.40                   |
| 267    | 350.00                    | 178.00                    | 186.00                                | 851.00                     | 786.00                     | 0.45      | 28.00         | 70.40                   |
| 268    | 300.00                    | 190.00                    | 200.00                                | 735.00                     | 910.00                     | 1.35      | 130.00        | 59.04                   |
| 269    | 315.00                    | 189.00                    | 135.00                                | 612.00                     | 1109.00                    | 4.60      | 28.00         | 28.95                   |
| 270    | 290.00                    | 175.50                    | 100.00                                | 837.00                     | 913.00                     | 0.80      | 90.00         | 55.90                   |
| 271    | 385.00                    | 231.00                    | 165.00                                | 612.00                     | 909.00                     | 3.81      | 28.00         | 30.01                   |
| 272    | 169.00                    | 190.35                    | 254.00                                | 853.00                     | 853.00                     | 0.00      | 7.00          | 15.60                   |
| 273    | 386.00                    | 193.00                    | 161.00                                | 1190.00                    | 434.00                     | 0.35      | 3.00          | 24.80                   |
| 274    | 385.00                    | 236.50                    | 165.00                                | 590.00                     | 910.00                     | 1.80      | 28.00         | 30.70                   |
| 275    | 427.00                    | 243.90                    | 115.00                                | 844.00                     | 779.00                     | 0.12      | 28.00         | 59.40                   |
| 276    | 386.00                    | 193.00                    | 161.00                                | 1190.00                    | 434.00                     | 0.35      | 7.00          | 31.30                   |
| 277    | 503.00                    | 183.00                    | 158.00                                | 700.00                     | 735.00                     | 0.76      | 182.00        | 69.50                   |
| 278    | 210.00                    | 201.50                    | 100.00                                | 837.00                     | 910.00                     | 0.80      | 7.00          | 11.10                   |
| 279    | 350.00                    | 190.00                    | 150.00                                | 735.00                     | 910.00                     | 1.35      | 3.00          | 24.11                   |
| 280    | 300.00                    | 175.00                    | 200.00                                | 663.00                     | 923.00                     | 1.50      | 7.00          | 48.98                   |
| 281    | 290.00                    | 180.00                    | 318.00                                | 700.00                     | 741.00                     | 0.66      | 90.00         | 62.50                   |
| 282    | 169.00                    | 190.35                    | 254.00                                | 853.00                     | 853.00                     | 0.00      | 28.00         | 30.20                   |
| 283    | 260.00                    | 215.00                    | 260.00                                | 775.00                     | 757.00                     | 0.77      | 365.00        | 54.90                   |
| 284    | 368.00                    | 161.00                    | 92.00                                 | 1058.20                    | 693.81                     | 0.24      | 28.00         | 64.96                   |
| 285    | 290.00                    | 180.00                    | 318.00                                | 700.00                     | 741.00                     | 0.66      | 28.00         | 54.00                   |
| 286    | 210.00                    | 201.50                    | 100.00                                | 837.00                     | 910.00                     | 0.80      | 28.00         | 19.10                   |
| 287    | 250.00                    | 210.00                    | 250.00                                | 856.00                     | 856.00                     | 1.72      | 90.00         | 30.32                   |
| 288    | 220.00                    | 132.00                    | 180.00                                | 900.00                     | 982.00                     | 0.35      | 28.00         | 51.00                   |
| 289    | 386.00                    | 193.00                    | 72.00                                 | 1190.00                    | 523.00                     | 0.42      | 90.00         | 50.50                   |
| 290    | 115.00                    | 167.00                    | 336.00                                | 924.00                     | 743.00                     | 0.65      | 7.00          | 8.40                    |
| 291    | 375.00                    | 195.00                    | 125.00                                | 735.00                     | 910.00                     | 1.35      | 3.00          | 27.66                   |
| 292    | 210.00                    | 279.50                    | 220.00                                | 837.00                     | 562.00                     | 0.20      | 28.00         | 10.20                   |
| 293    | 200.00                    | 160.00                    | 200.00                                | 843.00                     | 842.00                     | 0.17      | 1.00          | 7.00                    |
| 294    | 135.00                    | 180.00                    | 315.00                                | 805.00                     | 805.00                     | 0.26      | 7.00          | 17.47                   |
| 295    | 61.00                     | 140.70                    | 241.00                                | 864.00                     | 866.00                     | 0.30      | 28.00         | 35.80                   |
| 296    | 200.00                    | 180.00                    | 60.00                                 | 876.00                     | 782.00                     | 0.70      | 7.00          | 21.77                   |
| 297    | 115.00                    | 167.00                    | 336.00                                | 924.00                     | 743.00                     | 0.65      | 90.00         | 26.10                   |

| Sample | C<br>(kg/m <sup>3</sup> ) | W<br>(kg/m <sup>3</sup> ) | Class F<br>FA<br>(kg/m <sup>3</sup> ) | CA<br>(kg/m <sup>3</sup> ) | FA<br>(kg/m <sup>3</sup> ) | SP<br>(%) | Age<br>(days) | f <sub>c</sub><br>(MPa) |
|--------|---------------------------|---------------------------|---------------------------------------|----------------------------|----------------------------|-----------|---------------|-------------------------|
| 298    | 290.00                    | 253.50                    | 100.00                                | 837.00                     | 709.00                     | 0.20      | 90.00         | 35.70                   |
| 299    | 315.00                    | 180.00                    | 135.00                                | 831.00                     | 831.00                     | 0.40      | 7.00          | 32.07                   |
| 300    | 220.00                    | 176.00                    | 330.00                                | 881.00                     | 686.00                     | 1.21      | 28.00         | 47.50                   |
| 301    | 61.00                     | 140.70                    | 241.00                                | 864.00                     | 866.00                     | 0.30      | 7.00          | 20.60                   |
| 302    | 317.00                    | 262.35                    | 160.00                                | 837.00                     | 594.00                     | 0.50      | 7.00          | 17.00                   |
| 303    | 220.00                    | 156.00                    | 180.00                                | 900.00                     | 916.00                     | 0.35      | 1.00          | 13.00                   |
| 304    | 337.50                    | 189.00                    | 112.50                                | 612.00                     | 1109.00                    | 4.60      | 28.00         | 22.71                   |
| 305    | 275.00                    | 231.00                    | 275.00                                | 612.00                     | 909.00                     | 3.81      | 28.00         | 16.90                   |
| 306    | 400.00                    | 180.00                    | 20.00                                 | 876.00                     | 845.00                     | 0.70      | 28.00         | 55.77                   |
| 307    | 386.00                    | 193.00                    | 161.00                                | 1190.00                    | 434.00                     | 0.35      | 56.00         | 51.20                   |
| 308    | 360.00                    | 198.00                    | 90.00                                 | 855.00                     | 813.00                     | 0.71      | 28.00         | 52.10                   |
| 309    | 386.00                    | 193.00                    | 161.00                                | 1190.00                    | 434.00                     | 0.35      | 28.00         | 36.90                   |
| 310    | 210.00                    | 279.50                    | 220.00                                | 837.00                     | 562.00                     | 0.20      | 90.00         | 19.70                   |
| 311    | 276.00                    | 161.00                    | 184.00                                | 1058.20                    | 693.81                     | 0.24      | 7.00          | 43.76                   |
| 312    | 427.50                    | 188.10                    | 142.50                                | 812.10                     | 812.10                     | 0.50      | 28.00         | 50.00                   |
| 313    | 300.00                    | 180.00                    | 40.00                                 | 876.00                     | 813.00                     | 0.70      | 28.00         | 58.88                   |
| 314    | 322.00                    | 161.00                    | 138.00                                | 1058.20                    | 693.81                     | 0.24      | 90.00         | 72.61                   |
| 315    | 169.00                    | 190.35                    | 254.00                                | 853.00                     | 853.00                     | 0.00      | 1.00          | 5.20                    |
| 316    | 382.50                    | 189.00                    | 67.50                                 | 612.00                     | 1109.00                    | 4.60      | 28.00         | 16.56                   |
| 317    | 350.00                    | 190.00                    | 150.00                                | 735.00                     | 910.00                     | 1.35      | 130.00        | 55.24                   |
| 318    | 440.00                    | 231.00                    | 110.00                                | 612.00                     | 909.00                     | 3.81      | 28.00         | 23.27                   |
| 319    | 210.00                    | 193.50                    | 220.00                                | 837.00                     | 786.00                     | 0.80      | 7.00          | 15.50                   |
| 320    | 386.00                    | 193.00                    | 161.00                                | 1190.00                    | 434.00                     | 0.35      | 90.00         | 53.80                   |
| 321    | 207.00                    | 186.30                    | 207.00                                | 843.00                     | 845.00                     | 0.40      | 7.00          | 17.40                   |
| 322    | 270.00                    | 247.50                    | 180.00                                | 837.00                     | 647.00                     | 0.60      | 7.00          | 14.60                   |
| 323    | 465.00                    | 225.50                    | 85.00                                 | 590.00                     | 910.00                     | 1.95      | 28.00         | 35.33                   |
| 324    | 170.00                    | 157.00                    | 200.00                                | 900.00                     | 930.00                     | 0.20      | 1.00          | 6.00                    |
| 325    | 220.00                    | 156.00                    | 180.00                                | 900.00                     | 916.00                     | 0.35      | 28.00         | 49.00                   |
| 440.00 | 225.50                    | 110.00                    | 590.00                                | 910.00                     | 2.00                       | 90.00     | 52.80         | 440.00                  |
| 200.00 | 180.00                    | 60.00                     | 876.00                                | 782.00                     | 0.70                       | 1.00      | 4.44          | 200.00                  |
